# Supplementary material for: Hypoxic Culture Maintains Cell Growth of the Primary Human Valve Interstitial Cells with Stemness
Source: MDPI journal article supplement (doi:10.3390/ijms221910534), 2021-09-29

## SUPPLEMENTAL INFORMATION

Title: Hypoxic culture maintains cell growth of the primary human valve interstitial cells with stemness

### Supplemental table 1

Characteristics of aortic regurgitation patients  
included in cell growth analysis

|                                | Aortic regurgitation<br>(n = 3) |
|--------------------------------|---------------------------------|
| Age, y                         | 49 ± 22.2                       |
| Male, n (%)                    | 3(100)                          |
| Body mass index                | 18 ± 2.0                        |
| Hypertension, n (%)            | 6 (100)                         |
| Smokers, n (%)                 | 1 (33)                          |
| Dyslipidemia, n (%)            | 0 (0)                           |
| Diabetes, n (%)                | 0 (0)                           |
| Coronary artery disease, n (%) | 0 (0)                           |
| Tricuspid aortic valves, n (%) | 3 (100)                         |

Data are given as n (%) or means ± standard deviations.

## Supplemental table 2

Characteristics of aortic stenosis patients  
included in immunohistochemical analysis

|                                | Aortic stenosis |
|--------------------------------|-----------------|
|                                | (n = 6)         |
| Age, years                     | 66 ± 7          |
| Male, n (%)                    | 5(83)           |
| Body mass index                | 18 ± 3.2        |
| Hypertension, n (%)            | 6 (100)         |
| Smokers, n (%)                 | 1 (17)          |
| Dyslipidemia, n (%)            | 2 (33)          |
| Diabetes, n (%)                | 1 (17)          |
| Coronary artery disease, n (%) | 1 (17)          |
| Mean gradient (mmHg)           | 59 ± 16.8       |
| Tricuspid aortic valves, n (%) | 3 (50)          |

Data are given as n (%) or means ± standard deviations.

**Supplemental table 3**

Characteristics of autopsy patients  
included in immunohistochemical analysis

|                                  | Autopsy<br>(n = 6) |
|----------------------------------|--------------------|
| Age, y                           | 66 ± 13.3          |
| Male, n (%)                      | 2(33)              |
| Hypertension, n (%)              | 3 (50)             |
| Smokers, n (%)                   | 1 (17)             |
| Dyslipidemia, n (%)              | 0 (0)              |
| Diabetes, n (%)                  | 0 (0)              |
| Coronary artery disease, n (%)   | 3 (50)             |
| Time from death to autopsy (hrs) | 59 ± 16.8          |
| Tricuspid aortic valves, n (%)   | 6 (100)            |

Data are given as n (%) or means ± standard deviations.

Uncropped western blot image

Full-length blot for figure 3d

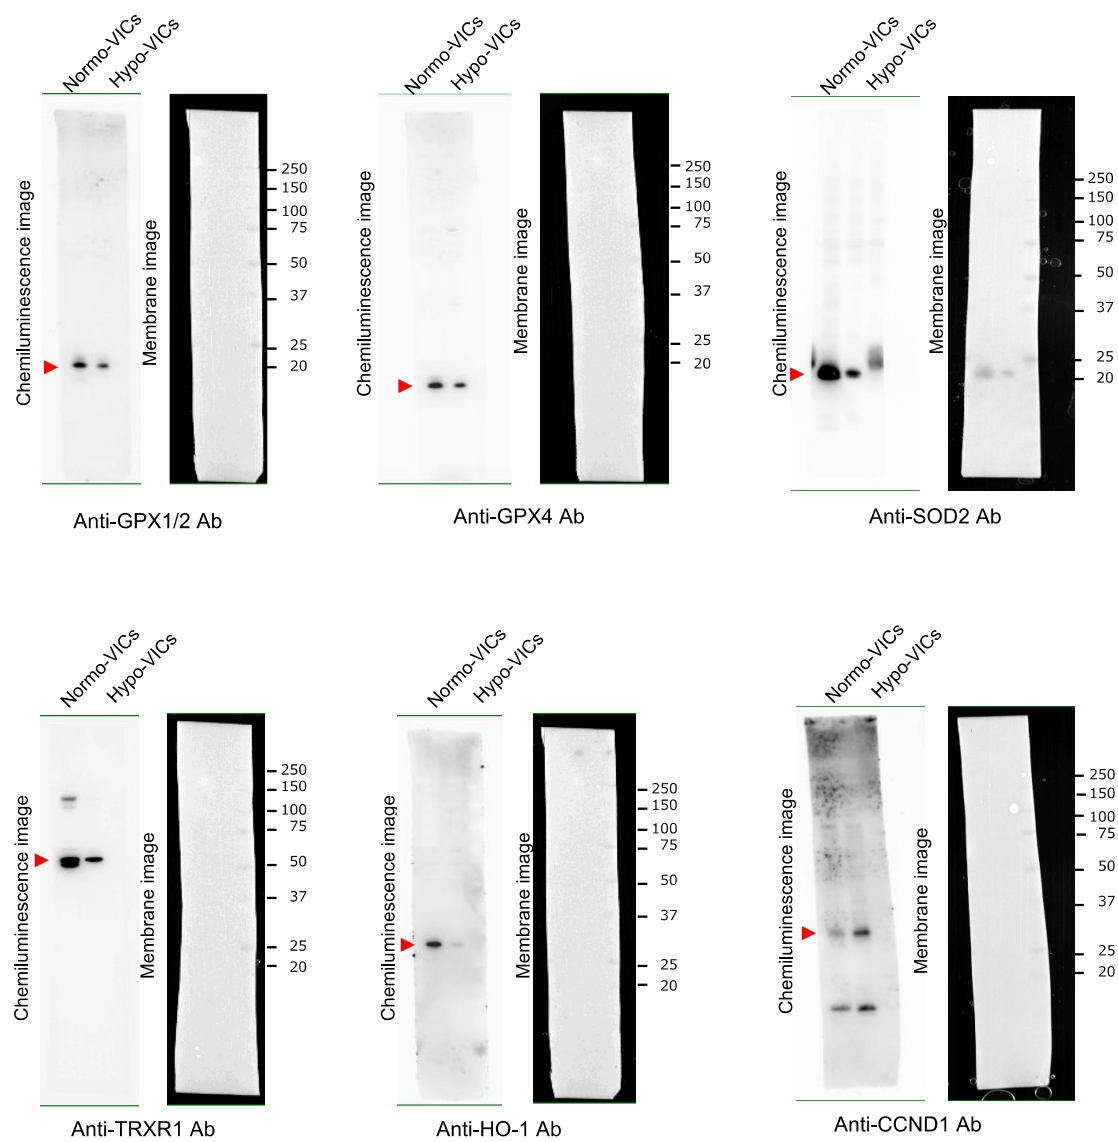

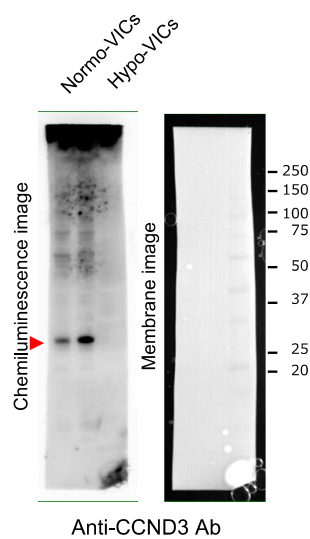

Anti-CCND3 Ab

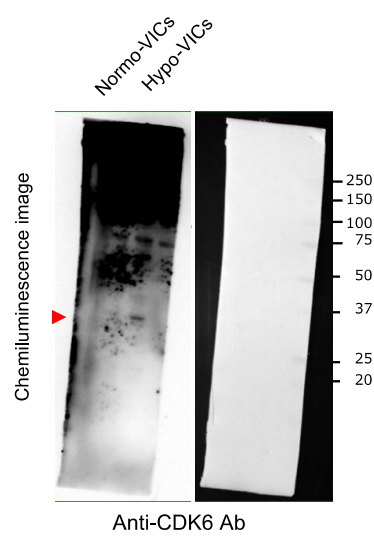

Anti-CDK6 Ab

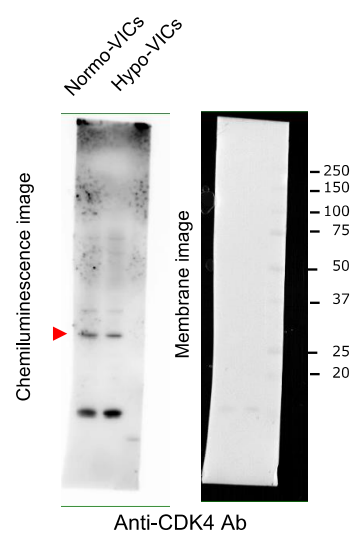

Anti-CDK4 Ab

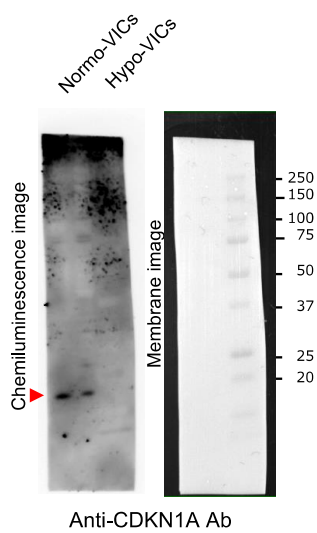

Anti-CDKN1A Ab

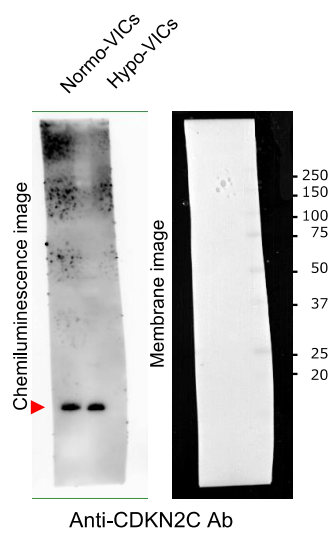

Anti-CDKN2C Ab

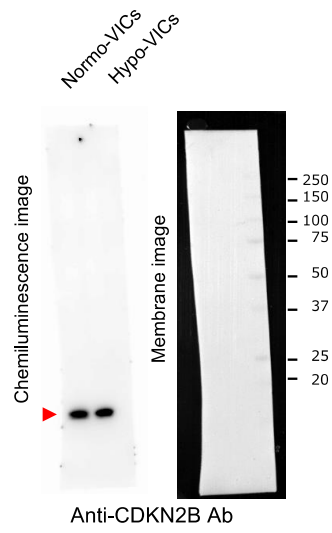

Anti-CDKN2B Ab

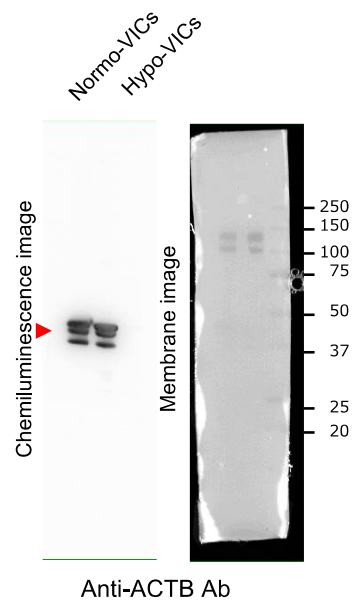

Full-length blot for figure 4b

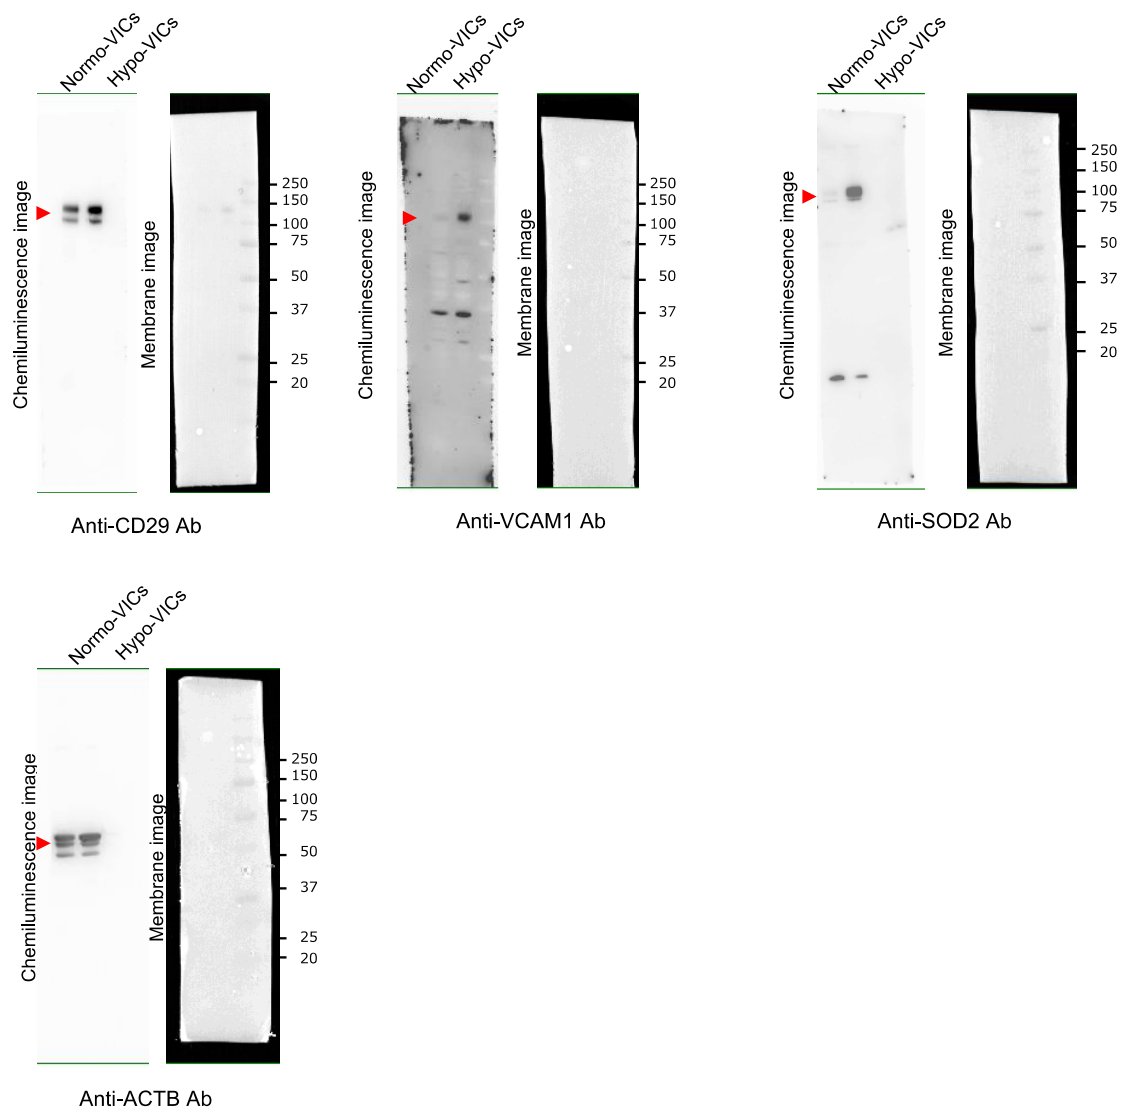

Full-length blot for figure 5c

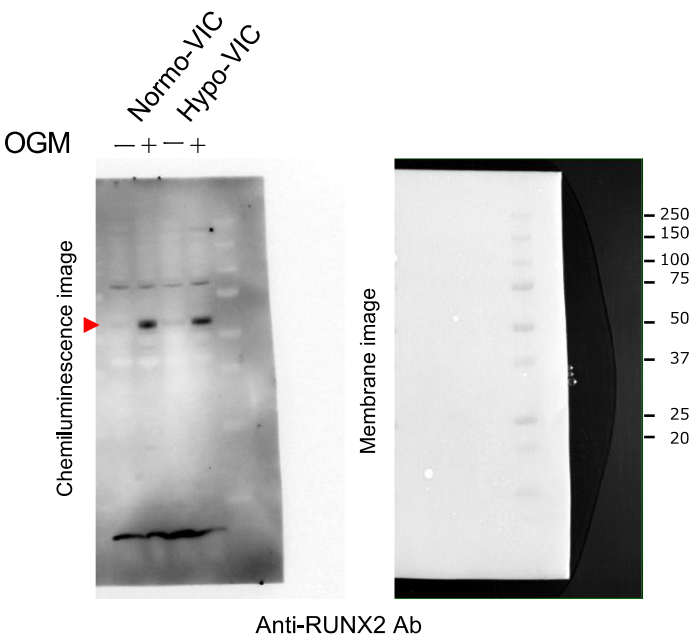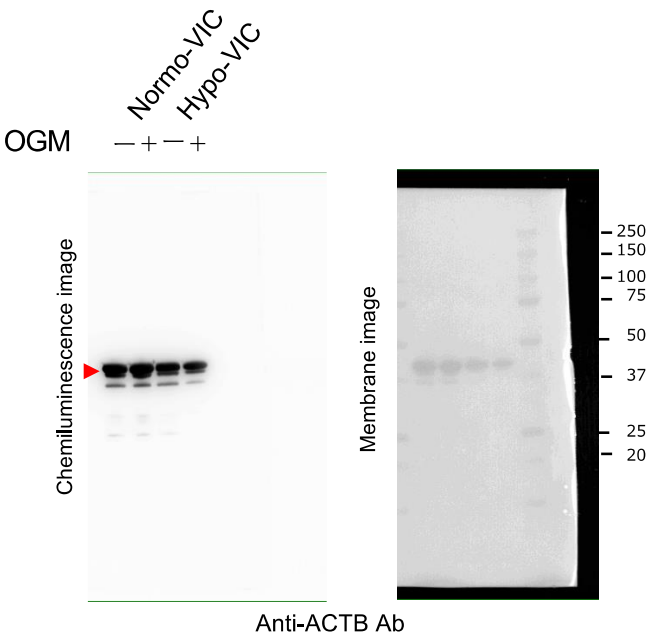

Supplement: s1 [file s1]
